# Supplementary material for: Recovering lead and sulfur from spent lead paste by molten salt electrolysis: a clean and sustainable lead and sulfur loop
Source: Royal Society of Chemistry journal article supplement (doi:10.1039/d4gc05220j), 2024-12-17
Supplement: d4gc05220j1.pdf [file d4gc05220j1.pdf]

## **Supporting Information**

### **Recovering Lead and Sulfur from Spent Lead Paste by Molten Salt Electrolysis:**

#### **A Clean and Sustainable Lead and Sulfur Loop**

Hongya Wang<sup>1,2</sup>, Fengyin Zhou<sup>1</sup>, Bingbing Wang<sup>2</sup>, Muya Cai<sup>1</sup>, Jingjing Zhao<sup>1</sup>, Xinyu Li<sup>1</sup>,  
Yongxin Wu<sup>1,2</sup>, Xiaowei Liu<sup>2</sup>, Xiang Chen<sup>1</sup>, Dihua Wang<sup>1,2,3</sup>, Huayi Yin<sup>1,2,3\*</sup>

1. School of Resource and Environmental Science, Wuhan University, 299 Bayi Road, Wuchang District, Wuhan 430072, P. R. China.
2. Joint Center of Green Manufacturing of Energy Storage Materials of Wuhan University and Chilwee, Wuhan 430072, P. R. China
3. Hubei International Scientific and Technological Cooperation Base of Sustainable Resource and Energy, Wuhan University, Wuhan 430072, P. R. China

\*-Corresponding author. Email: [yinhuayi@whu.edu.cn](mailto:yinhuayi@whu.edu.cn) (Huayi Yin)

#### **This PDF file includes:**

Supporting Information **Fig. S1** to **Fig. S19**;

**Tab. S1**, **Tab. S2**;

Calculation of energy consumption for this process;

Calculation of SO<sub>2</sub> emissions;

**30 pages in total.**

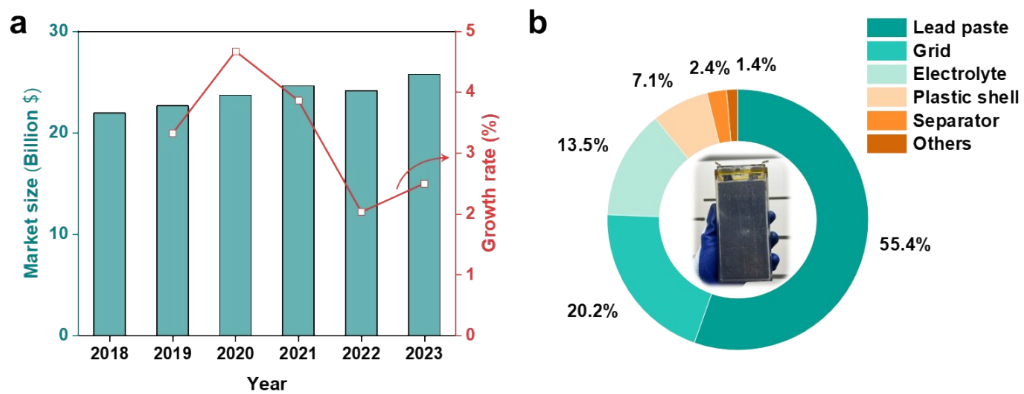

**Fig. S1.** (a) Global lead-acid battery (LAB) market size and growth rate in recent years, (b) the weight ratio of each component in LAB.

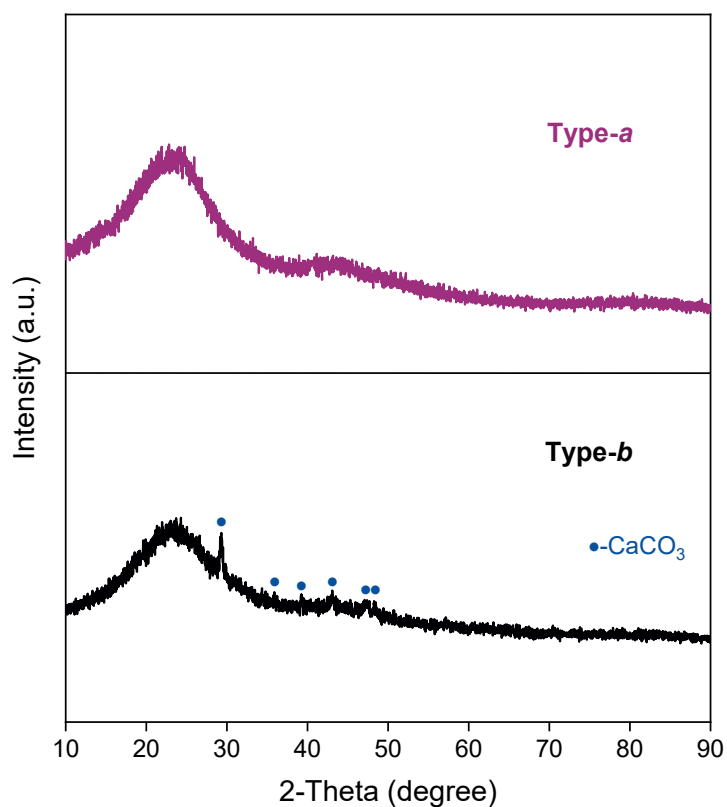

**Fig. S2.** XRD patterns of charcoal for roasting.

The charcoal used throughout the experimental phase consisted of two types: (*a*) crushed, sieved ( $\leq 0.1$  mm), and then hydrochloric acid (1 M) washed charcoal; and (*b*) crushed, sieved, and used directly (Fig. S2). Type-*b* was applied only to the recovery of 50 g-scale SLP, and the rest were used type-*a*.

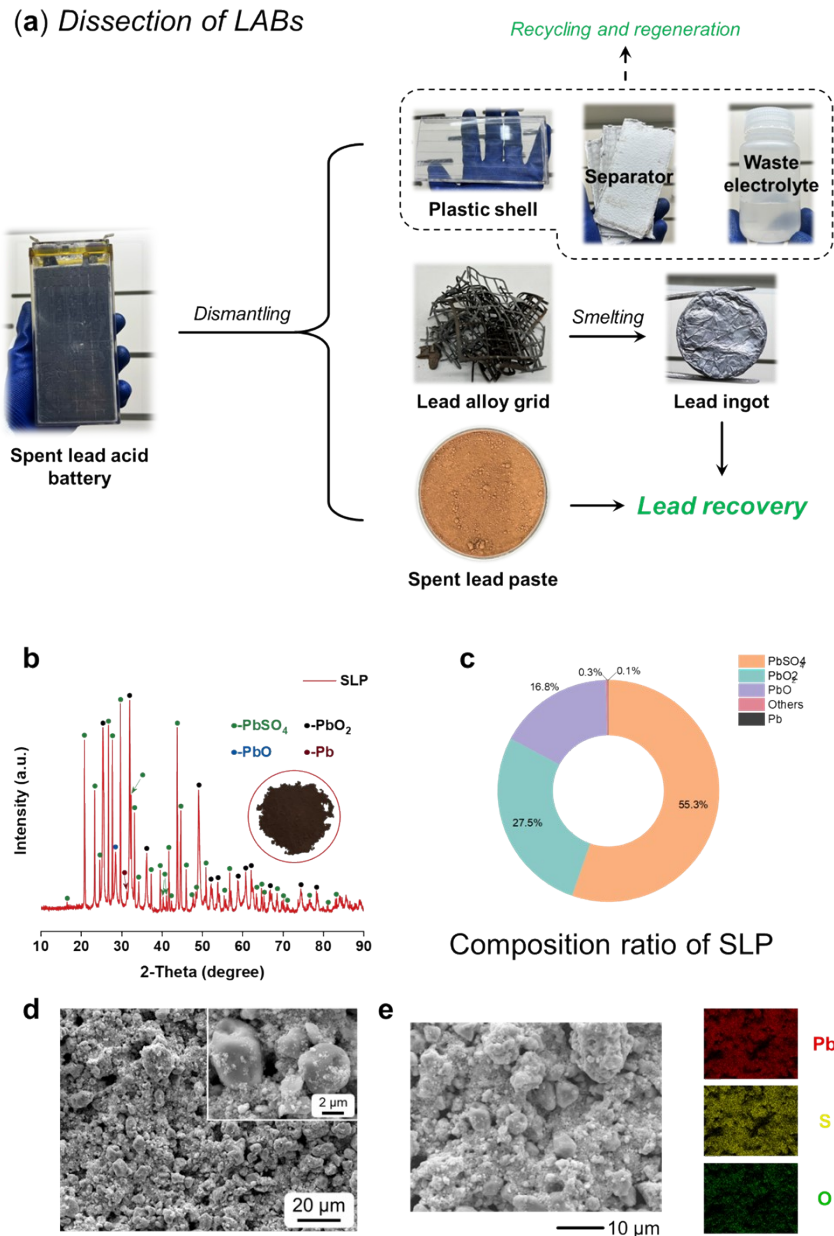

**Fig. S3.** (a) Schematic of dismantling spent LABs, (b) XRD patterns of spent lead paste (SLP), (c) chemical compositions of SLP, (d) SEM images and (e) the element mappings of SLP.

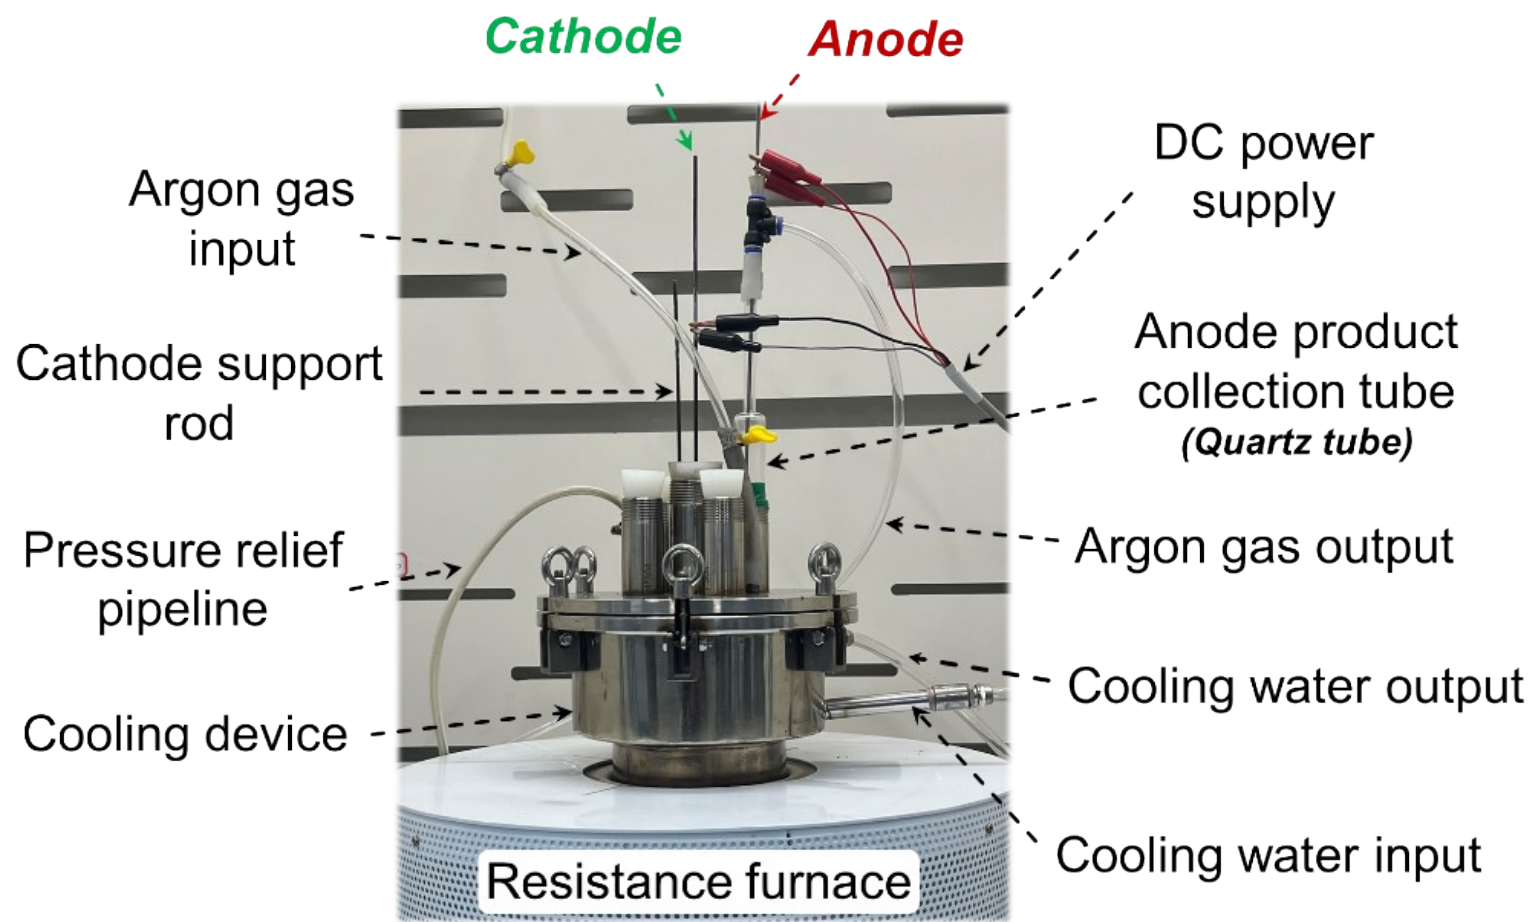

**Fig. S4.** Optical schematic of the electrolysis reactor.

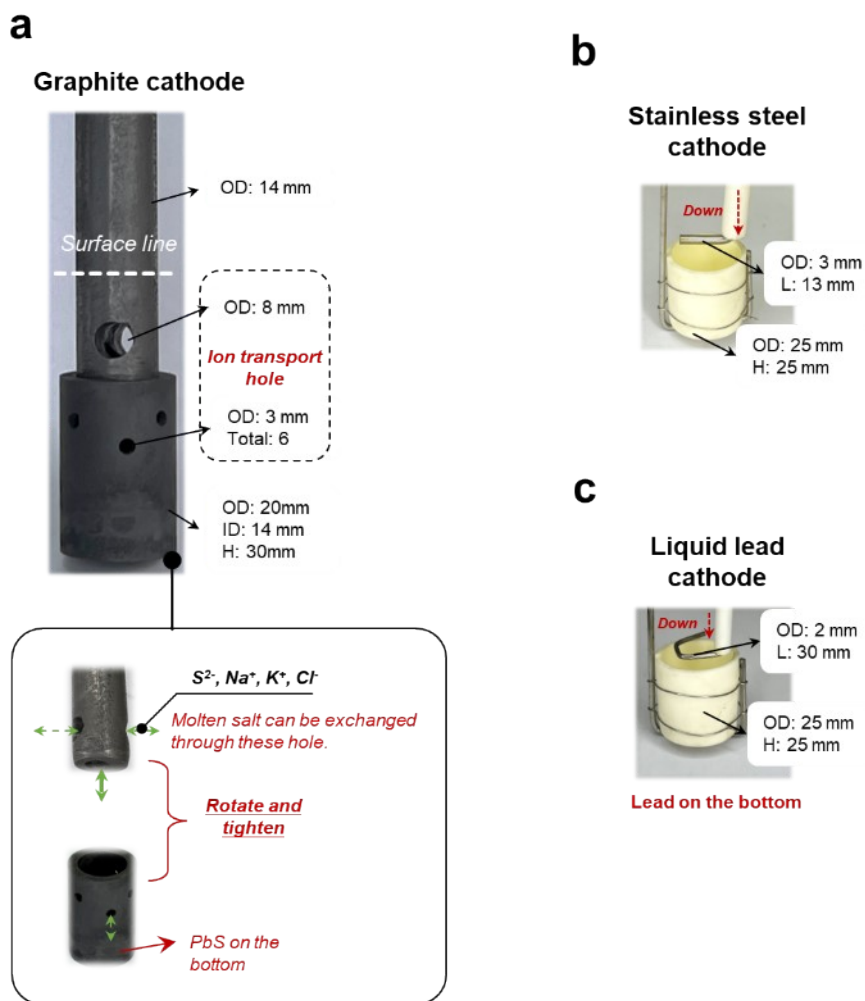

**Fig. S5.** Optical photos of cathode electrodes: (a)-graphite cathode, (b)-stainless steel cathode, (c)-liquid lead cathode.

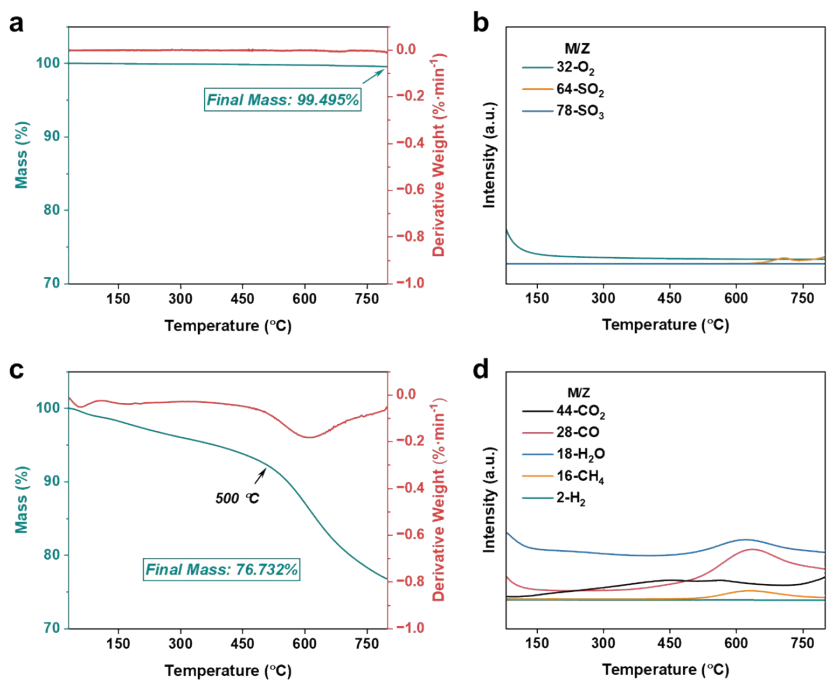

**Fig. S6.** TG-DTG curves and MS curves of (a & b) PbSO<sub>4</sub> and (c & d) charcoal (Heating rate: 20 °C·min<sup>-1</sup>, Atmosphere: He).

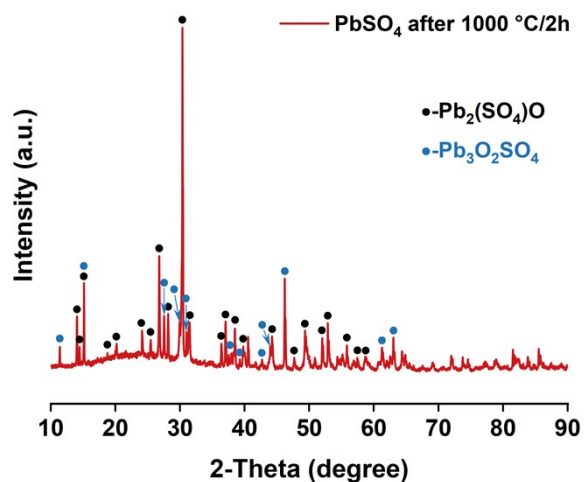

**Fig. S7.** XRD patterns of  $\text{PbSO}_4$  roasted at  $1000\text{ }^\circ\text{C}$  for 2 h (Atmosphere: Ar).

## Discussion

$\text{PbSO}_4$  remains stable up to  $800\text{ }^\circ\text{C}$ , exhibiting only a 0.505% mass loss (Fig. S6a). A minimal amount of  $\text{SO}_2$  decomposition is observed around  $700\text{ }^\circ\text{C}$  (Fig. S6b). Subsequently, roasting at  $1000\text{ }^\circ\text{C}$  for 2 h in an argon atmosphere was conducted, revealing the formation of  $\text{Pb}_2(\text{SO}_4)\text{O}$  and  $\text{Pb}_3\text{O}_2\text{SO}_4$  phases (Fig. S7), indicating the self-decomposition of  $\text{PbSO}_4$  upon heating. Furthermore, charcoal contains trace amounts of undecomposed lignin, cellulose, and hemicellulose (Fig. S6c). Gas analysis (Fig. S6d) indicates that the generated gases are primarily  $\text{H}_2\text{O}$ ,  $\text{CO}$ , and  $\text{CH}_4$ , which can also facilitate the conversion of  $\text{PbSO}_4$  to  $\text{PbS}$ .



**Molar ratio**

|          |                         |                 |
|----------|-------------------------|-----------------|
| <b>1</b> | <b>PbSO<sub>4</sub></b> | <b>1.0000 g</b> |
| <b>4</b> | <b>C</b>                | <b>0.1584 g</b> |

*If the following reaction occurs:*

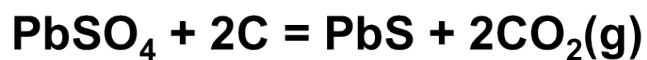

*Then*    **1.0000 g**   **0.0792 g**   **0.7890 g**

*So finally*

$$\text{Final mass} = \frac{\text{Final}}{\text{Initial}} = \frac{0.8682 \text{ g}}{1.1584 \text{ g}} \times 100\% = \mathbf{74.946\%}$$

**Fig. S8.** Final mass analysis of PbSO<sub>4</sub>-C in TG test.

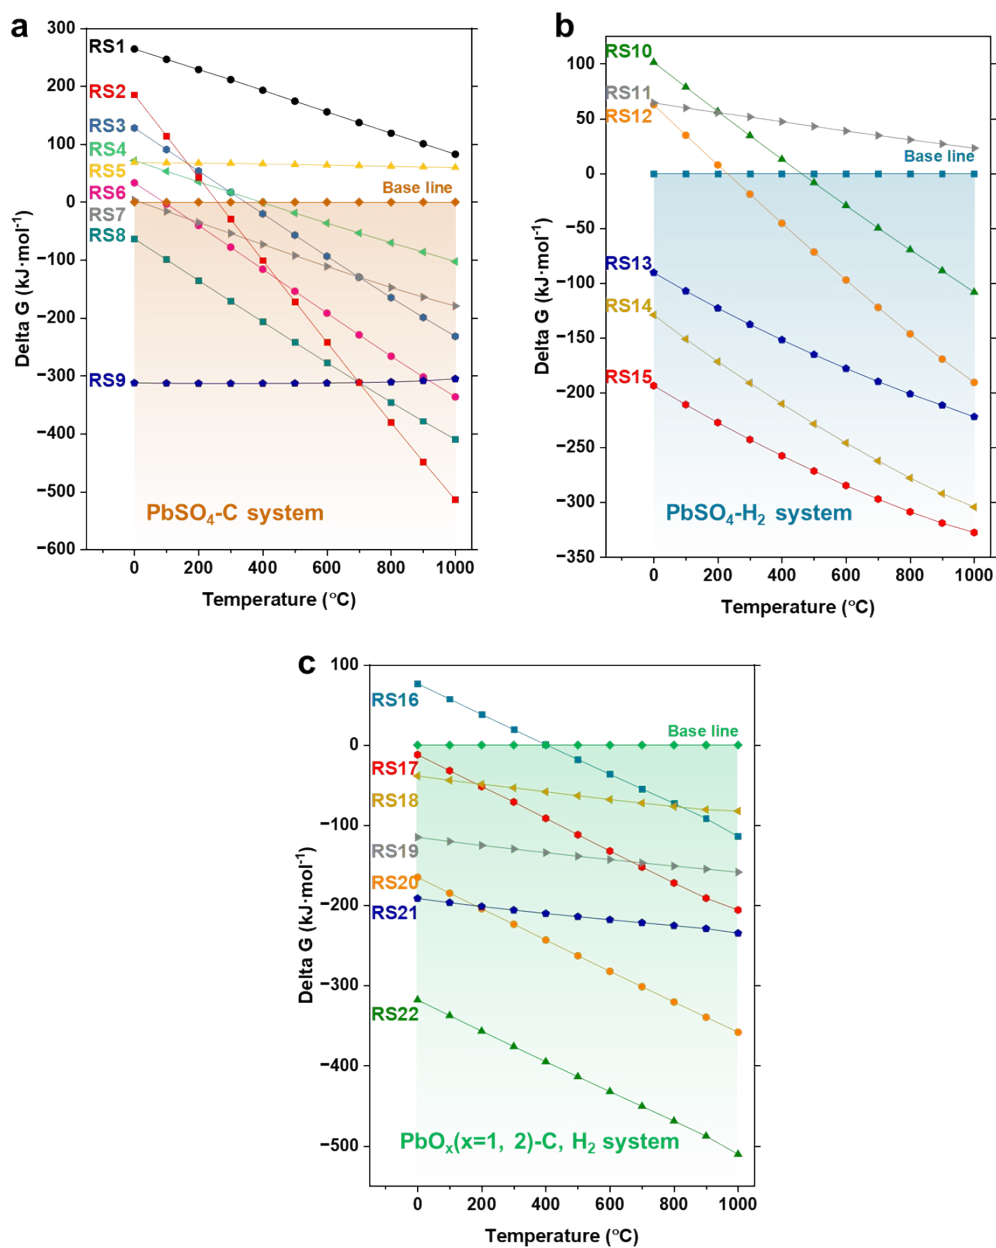

**Fig. S9.** The standard *Gibbs* free energy as a function of temperature: (a) PbSO<sub>4</sub>-C system; (b) PbSO<sub>4</sub>-H<sub>2</sub> system; (c) PbO<sub>x</sub> (x = 1, 2)-C, H<sub>2</sub> system (The chemical reaction is shown in **Tab. S1**).

**Tab. S1.** The corresponding chemical reaction in Fig. S9.

| <b>Serial number</b> | <b>Chemical reaction</b>                                                                                            |
|----------------------|---------------------------------------------------------------------------------------------------------------------|
| RS1                  | $2\text{PbS} + \text{C} = 2\text{Pb} + \text{CS}_2(\text{g})$                                                       |
| RS2                  | $\text{PbSO}_4 + 4\text{C} = \text{PbS} + 4\text{CO}(\text{g})$                                                     |
| RS3                  | $\text{PbSO}_4 + \text{C} = \text{Pb} + \text{SO}_2(\text{g}) + \text{CO}_2(\text{g})$                              |
| RS4                  | $\text{PbSO}_4 + \text{CO}(\text{g}) = \text{PbO} + \text{SO}_2(\text{g}) + \text{CO}_2(\text{g})$                  |
| RS5                  | $\text{PbS} + \text{CO}(\text{g}) = \text{Pb} + \text{COS}(\text{g})$                                               |
| RS6                  | $\text{PbSO}_4 + 2\text{C} = \text{Pb} + \text{S} + 2\text{CO}_2(\text{g})$                                         |
| RS7                  | $\text{PbSO}_4 + 2\text{CO} = \text{Pb} + \text{SO}_2 + 2\text{CO}_2(\text{g})$                                     |
| RS8                  | $\text{PbSO}_4 + 2\text{C} = \text{PbS} + 2\text{CO}_2(\text{g})$                                                   |
| RS9                  | $\text{PbSO}_4 + 4\text{CO}(\text{g}) = \text{PbS} + 4\text{CO}_2(\text{g})$                                        |
| RS10                 | $\text{PbSO}_4 + \text{H}_2(\text{g}) = \text{PbO} + \text{SO}_2(\text{g}) + \text{H}_2\text{O}(\text{g})$          |
| RS11                 | $\text{PbS} + \text{H}_2(\text{g}) = \text{Pb} + 4\text{H}_2\text{S}(\text{g})$                                     |
| RS12                 | $\text{PbSO}_4 + 2\text{H}_2(\text{g}) = \text{Pb} + \text{SO}_2(\text{g}) + 2\text{H}_2\text{O}(\text{g})$         |
| RS13                 | $\text{PbSO}_4 + 4\text{H}_2(\text{g}) = \text{PbO} + \text{H}_2\text{S}(\text{g}) + 3\text{H}_2\text{O}(\text{g})$ |
| RS14                 | $\text{PbSO}_4 + 5\text{H}_2(\text{g}) = \text{Pb} + \text{H}_2\text{S}(\text{g}) + 4\text{H}_2\text{O}(\text{g})$  |
| RS15                 | $\text{PbSO}_4 + 4\text{H}_2(\text{g}) = \text{PbS} + 4\text{H}_2\text{O}(\text{g})$                                |
| RS16                 | $\text{PbO}_2 = \text{PbO} + \text{O}_2(\text{g})$                                                                  |
| RS17                 | $2\text{PbO} + \text{C} = 2\text{Pb} + \text{CO}_2(\text{g})$                                                       |
| RS18                 | $\text{PbO} + \text{H}_2(\text{g}) = \text{Pb} + \text{H}_2\text{O}(\text{g})$                                      |
| RS19                 | $1/2\text{PbO}_2 + \text{H}_2(\text{g}) = 1/2\text{Pb} + \text{H}_2\text{O}(\text{g})$                              |
| RS20                 | $\text{PbO}_2 + \text{C} = \text{Pb} + \text{CO}_2(\text{g})$                                                       |
| RS21                 | $\text{PbO}_2 + \text{H}_2(\text{g}) = \text{PbO} + \text{H}_2\text{O}(\text{g})$                                   |
| RS22                 | $2\text{PbO}_2 + \text{C} = 2\text{PbO} + \text{CO}_2(\text{g})$                                                    |

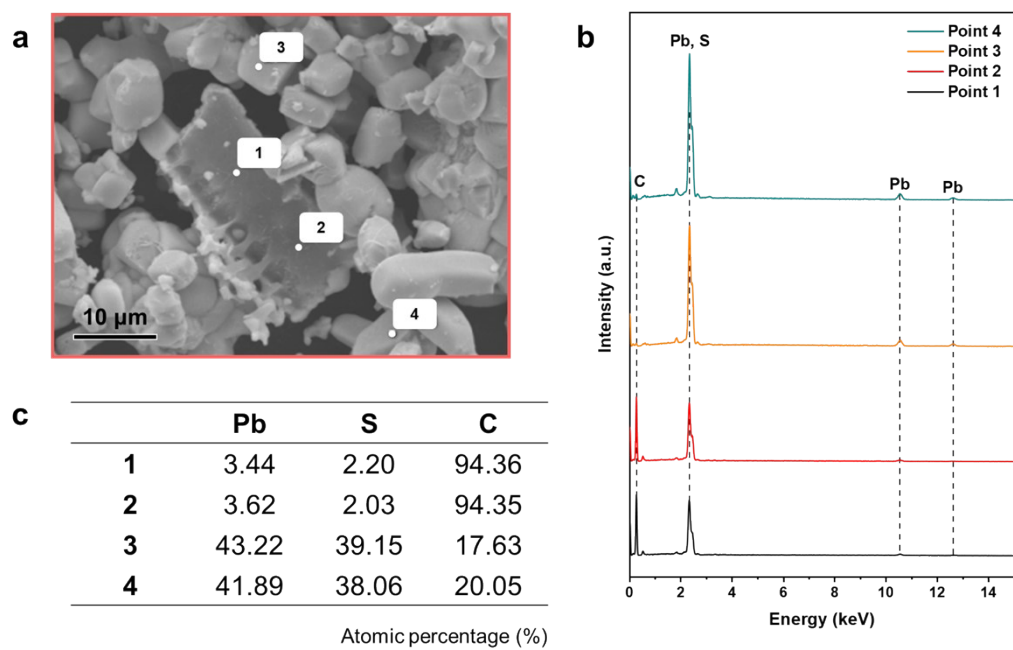

**Fig. S10.** (a) Samples consistent with Fig. 2e, selected points for EDS spectra, (b) EDS results, and (c) atomic percentage.

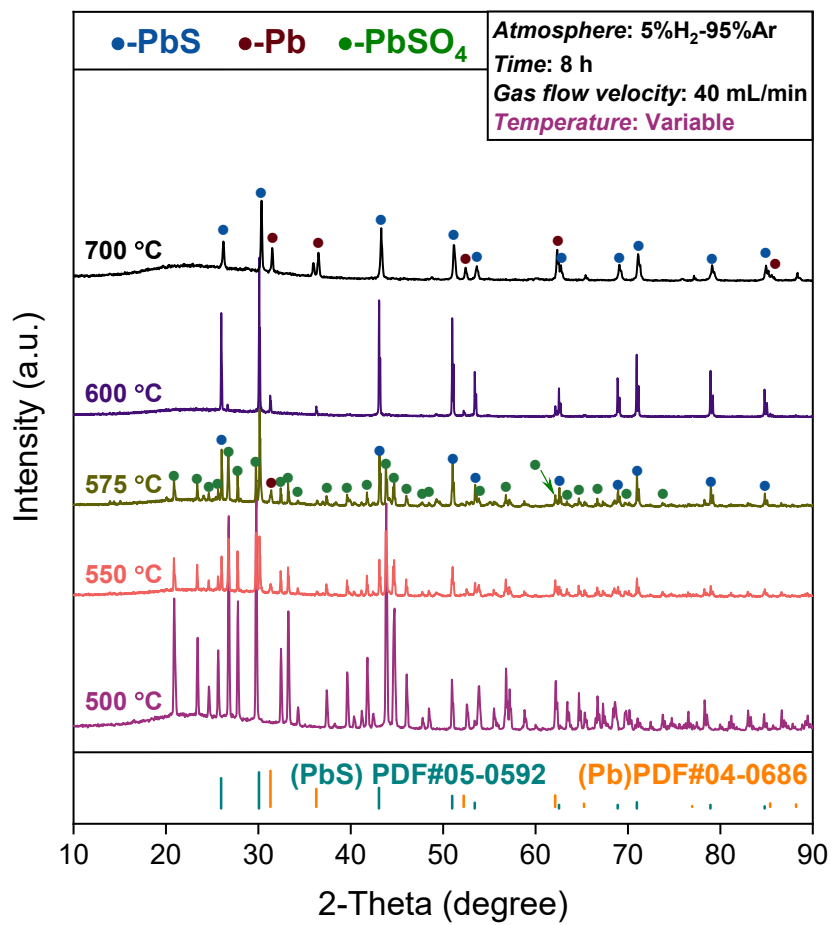

**Fig. S11.** XRD patterns of hydrogen-thermal reduction of PbSO<sub>4</sub> at different temperatures.

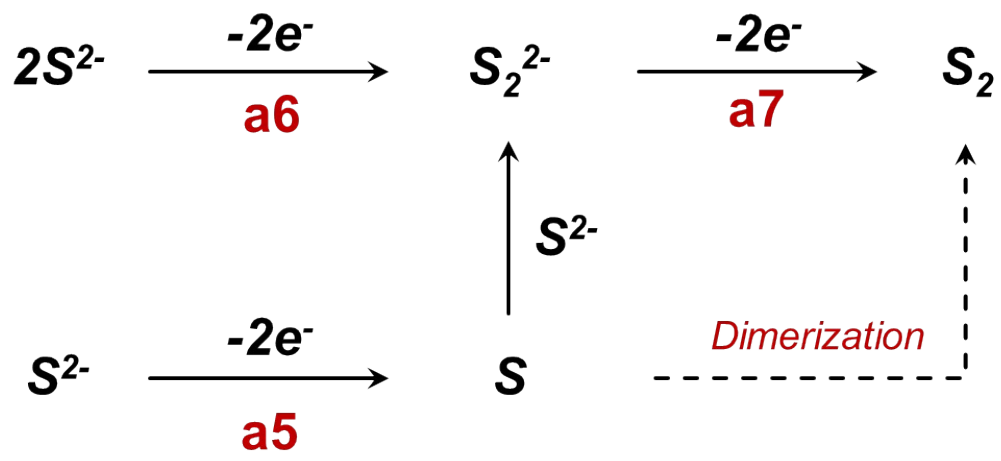

Fig. S12. Evolutionary mechanism of electro-oxidation of S<sup>2-</sup> to S<sub>2</sub>.

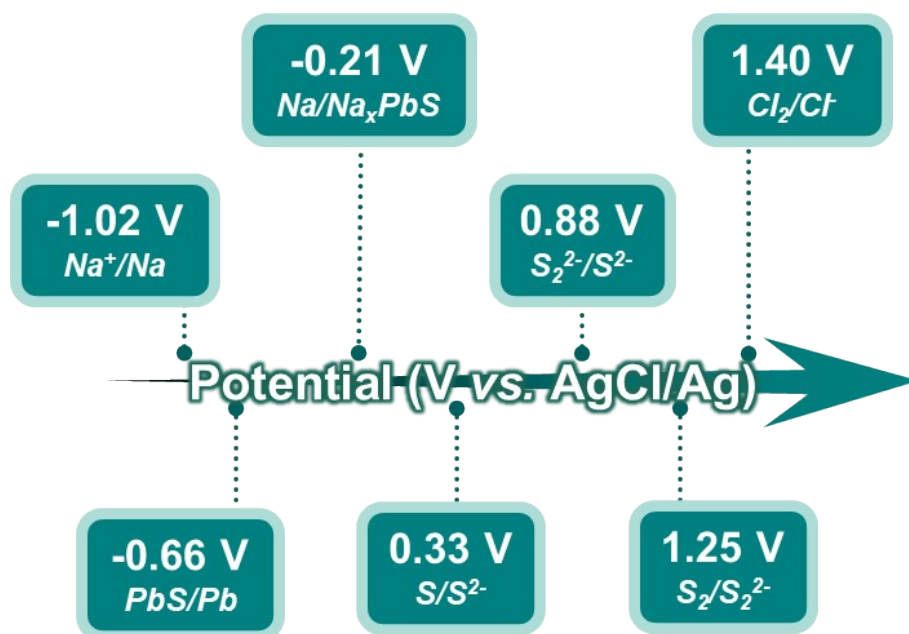

**Fig. S13.** Sequence of potential electrode reactions.

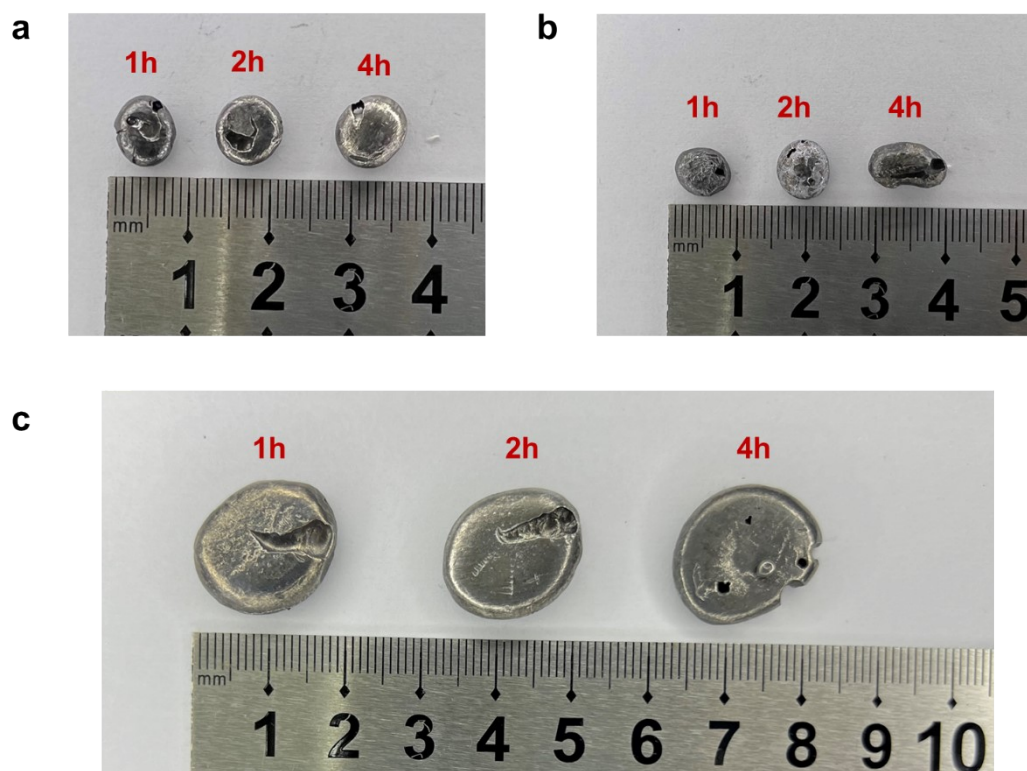

**Fig. S14.** Optical photos of cathodic products of PbS-electrolysis using different cathodes: (a) graphite cathode, (b) stainless steel cathode, (c) liquid lead cathode.



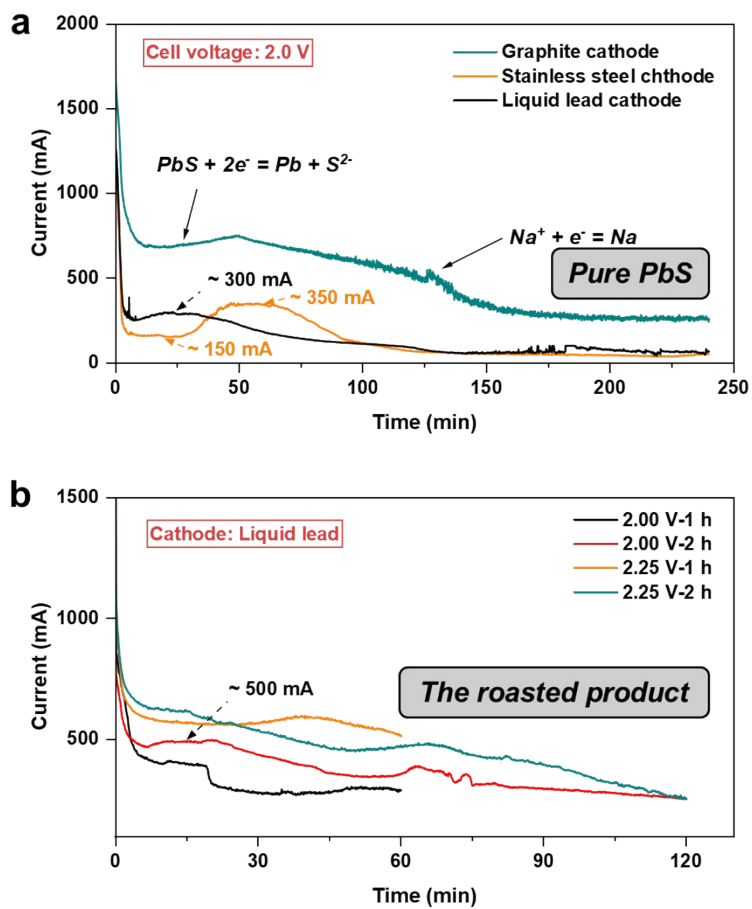

**Fig. S15.** The current-time plots of electrolysis of (a) pure PbS and (b) the roasted product.

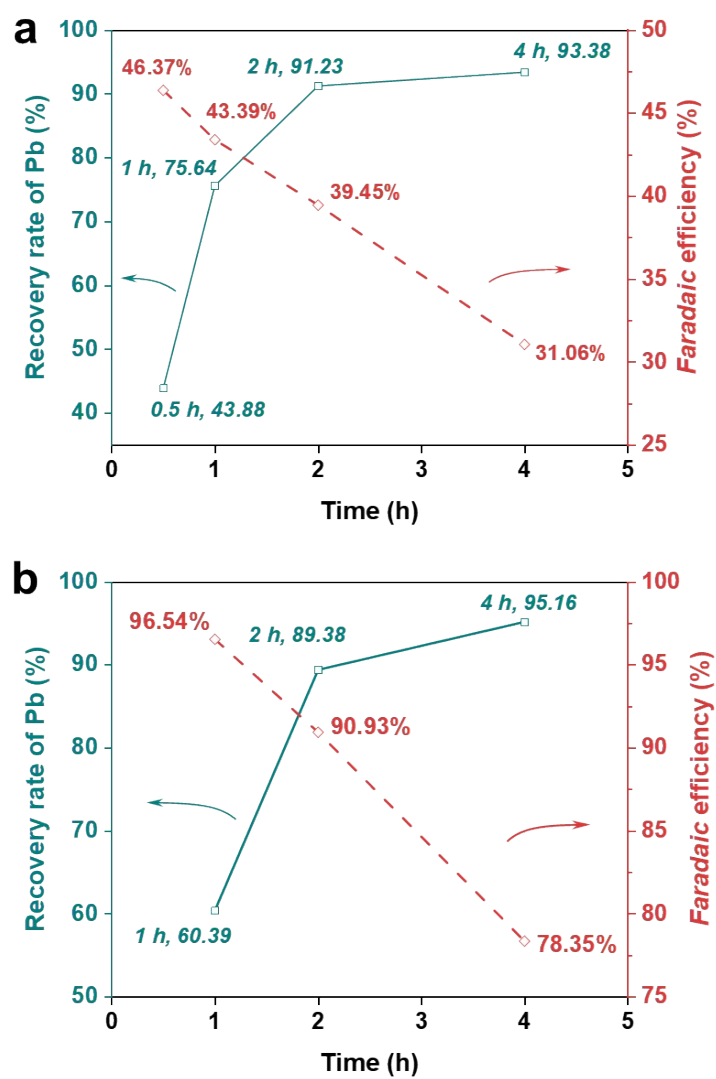

**Fig. S16.** The *Faradaic* efficiency using (a) graphite cathode and (b) stainless steel cathode.

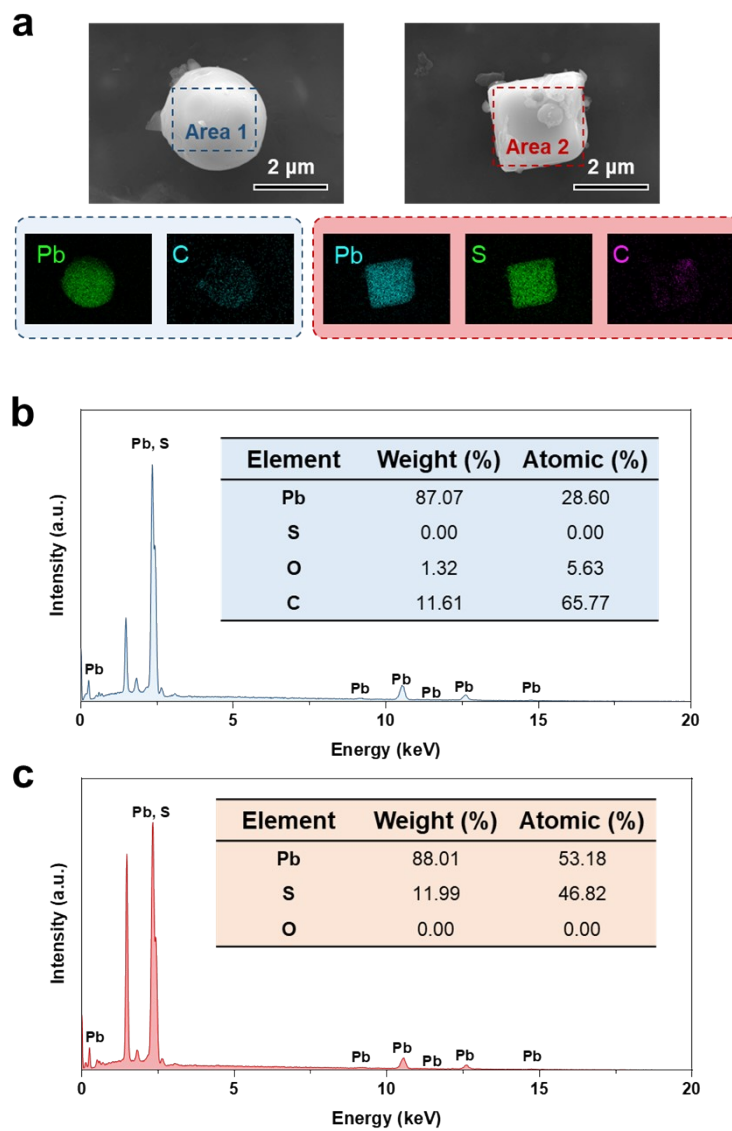

**Fig. S17.** (a) The element mappings of matter with different morphologies, as well as the EDS and elemental content in (b) Area 1 and (c) Area 2.

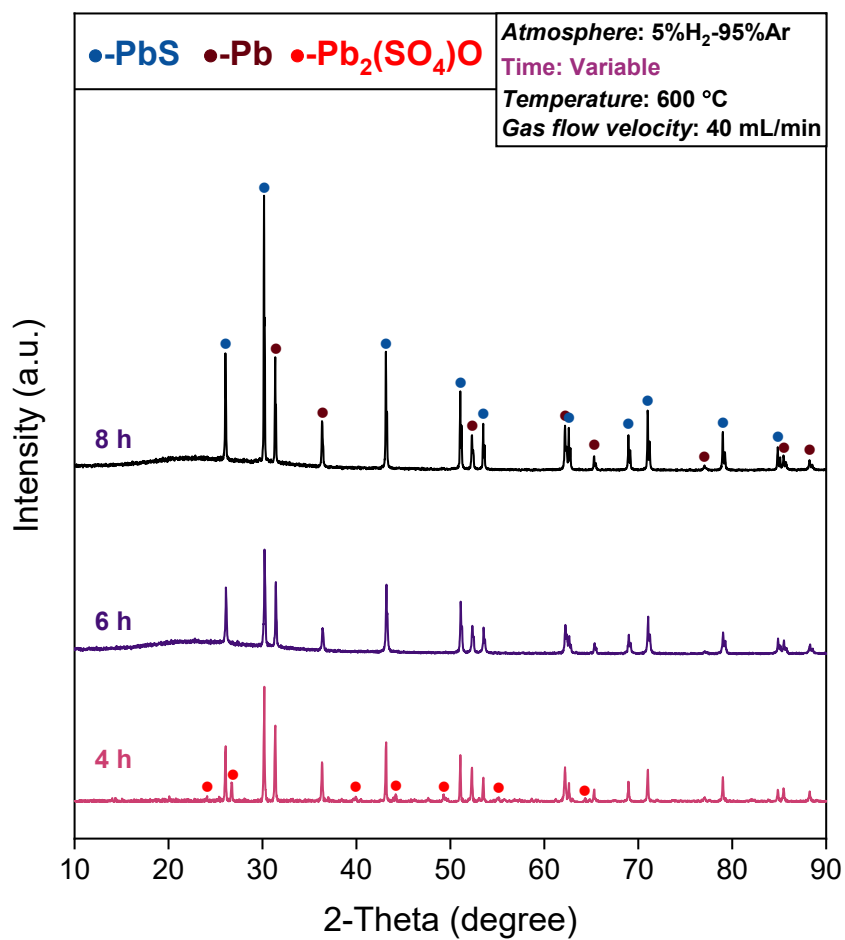

**Fig. S18.** XRD patterns of hydrogen-thermal reduction of SLP at different times at 600°C.

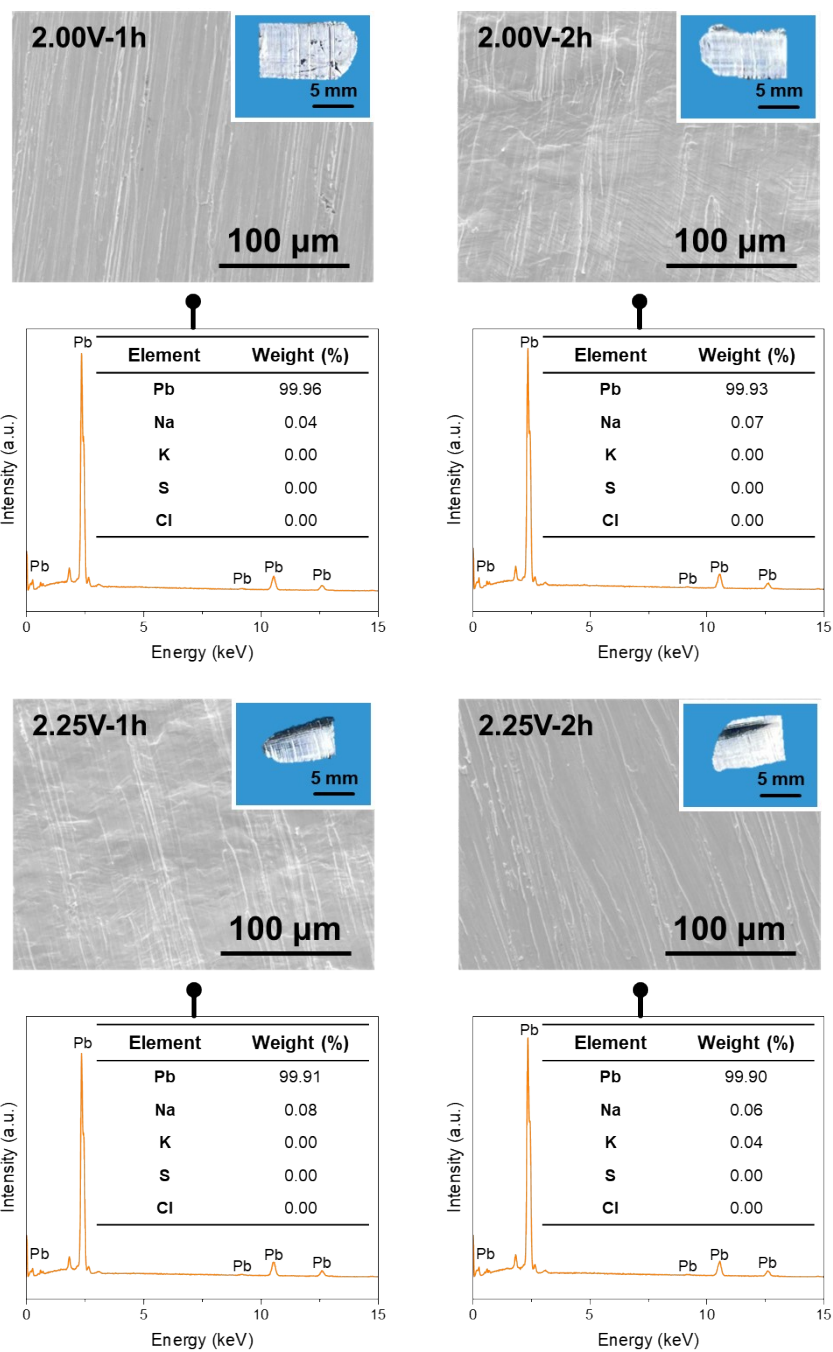

**Fig. S19.** SEM and EDS of the cross-section of the electrolysis products of roasted product (the inset is the corresponding optical photo).

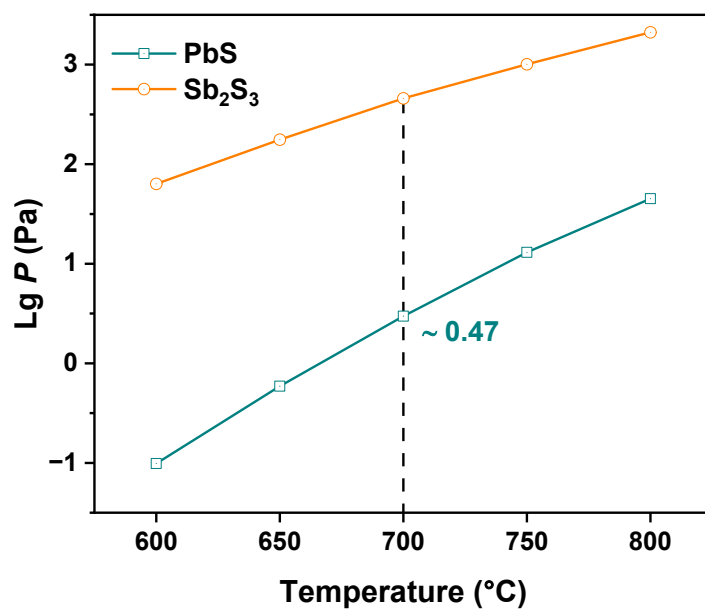

**Fig. S20.** Relationship curves between the vapor pressure and temperature of PbS and Sb<sub>2</sub>S<sub>3</sub>.<sup>1</sup>

## Regeneration of spent electrolytes

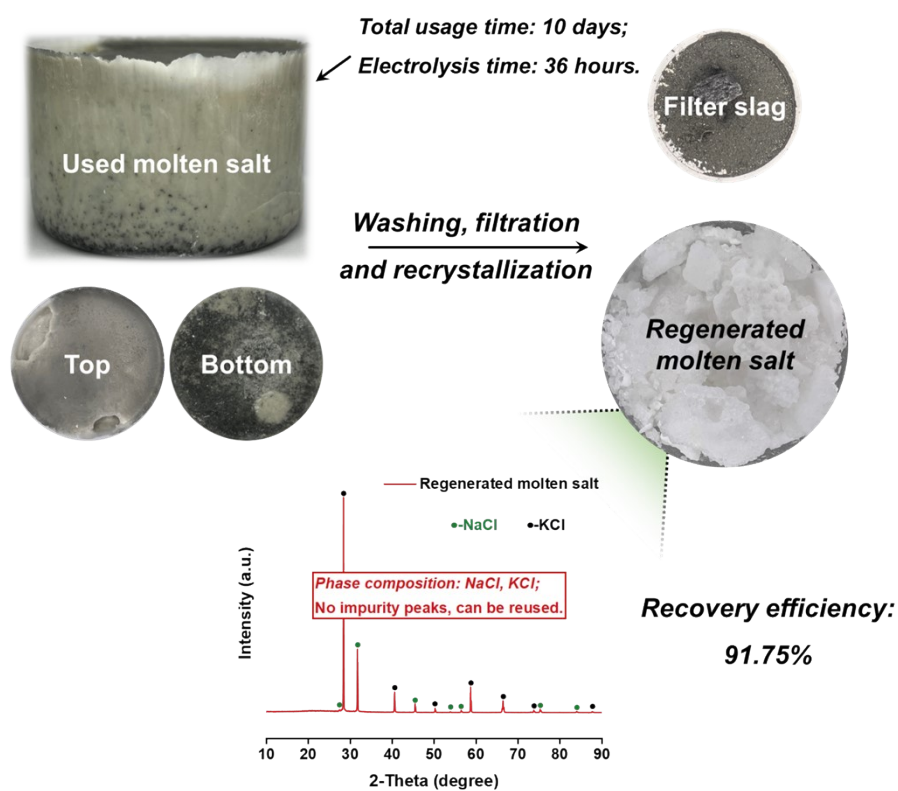

**Fig. S21.** Schematic of electrolyte regeneration and XRD pattern of regenerated electrolyte.

**Tab. S2.** Comparison of CO<sub>2</sub> reduction calculations.

|                                                    | Oxygen-Rich Side-Blown Bath<br>Smelting Process | This work |
|----------------------------------------------------|-------------------------------------------------|-----------|
| Energy consumption<br>(kgce·(t-Pb) <sup>-1</sup> ) | 121.8                                           | 39.8      |
| Carbon content<br>(%)                              | 90%                                             |           |
| CO <sub>2</sub> emissions<br>(kg)                  | 401.94                                          | 131.34    |

kgce: kilogram standard coal.



**Tab. S3.** Recent research progress in SLP recycling.

| <b>Methods</b>          | <b>Products</b><br>(containing-Pb) | <b>Pb recovery rate</b><br>(%) | <b>Flow of sulfate</b>                            | <b>SO<sub>2</sub> emissions</b><br>(kg/t-SLP) | <b>Temperature</b><br>(°C) | <b>Ref.</b>               |
|-------------------------|------------------------------------|--------------------------------|---------------------------------------------------|-----------------------------------------------|----------------------------|---------------------------|
| 1                       | Pb                                 | 92~95                          | SO <sub>2</sub>                                   | 116.83                                        | ~1300                      | —                         |
| 2                       | Pb                                 | 85~90                          | Na <sub>2</sub> SO <sub>4</sub>                   | —                                             | ~700                       | —                         |
| 3                       | Pb                                 | 98                             | Na <sub>2</sub> SO <sub>4</sub> , SO <sub>2</sub> | 2.8%<br>(in fume)                             | 1040                       | Li et al. <sup>2</sup>    |
| 4                       | Pb                                 | 93                             | FeS                                               | ~2.34                                         | 1150                       | Li et al. <sup>3</sup>    |
| 5                       | PbCl <sub>2</sub>                  | 99.7                           | CaSO <sub>4</sub>                                 | —                                             | 650                        | Liu et al. <sup>4</sup>   |
| 6                       | Pb                                 | 98.13                          | Na <sub>2</sub> SO <sub>4</sub>                   | —                                             | 850                        | Ma et al. <sup>5</sup>    |
| 7                       | PbS                                | 98.37                          | CaSO <sub>4</sub>                                 | —                                             | 800                        | Liu et al. <sup>6</sup>   |
| 8                       | PbCO <sub>3</sub>                  | 99.7                           | CaSO <sub>4</sub>                                 | —                                             | 80                         | Chai et al. <sup>7</sup>  |
| 9                       | Pb                                 | 95.28                          | Na <sub>2</sub> SO <sub>4</sub>                   | —                                             | 90                         | Chang et al. <sup>8</sup> |
| 10                      | α-PbO                              | 99.8                           | (NH <sub>4</sub> ) <sub>2</sub> SO <sub>4</sub>   | —                                             | 80                         | Liu et al. <sup>9</sup>   |
| 11                      | Pb                                 | 95.61                          | CaSO <sub>4</sub>                                 | —                                             | 40                         | Dai et al. <sup>10</sup>  |
| 12                      | PbO@C                              | —                              | Na <sub>2</sub> SO <sub>4</sub>                   | —                                             | 600                        | Hu et al. <sup>11</sup>   |
| <b><i>This work</i></b> | <b>Pb</b>                          | <b>97.85</b>                   | <b>S</b>                                          | <b>&lt; 5.84</b>                              | <b>700</b>                 | <b>—</b>                  |

“—” means nothing here;  $SO_2$  content in fume in red.

Texts:

- 1-The oxygen-rich side-blown bath smelting process.
- 2-The sodium carbonate desulfurization process.
- 3-The low-temperature alkali smelting process.
- 4-The iron oxide sulfur fixation process.
- 5-The vacuum-chlorination processes.
- 6-The hydrometallurgical desulfurization and vacuum thermal reduction.
- 7-The integrated vacuum chlorinating and hydrothermal process.
- 8-The enhanced desulfurization method using  $(NH_4)_2CO_3$ .
- 9-The hydrometallurgical extraction of lead in the methanesulfonic acid system.
- 10-The hydrometallurgical extraction of lead in the conjugated solution of ammonium sulfate-ammonia  $((NH_4)_2SO_4-NH_3)$ .
- 11-The recovery of high purity lead from SLP *via* direct electrolysis.
- 12-The synthesis of Nanostructured  $PbO@C$ .

***This work*-Thermal reduction-molten salt electrolysis process.**

### Calculation of energy consumption for this process (Fig. 7b)

Take Recycling 1 kg SLP as an example:

#### 1. Roasting

1 kg SLP requires 118.8 g charcoal as reductant, of which SLP contains 553 g PbSO<sub>4</sub>, 275 g PbO<sub>2</sub>, and 168 g PbO.

##### 1.1 *Input*

$$C_{p,m}(\text{charcoal}) = \sim 0.8 \text{ J}\cdot\text{K}^{-1}\cdot\text{kg}^{-1}$$

$$Q_{(\text{Charcoal})} = C_{p,m}(\text{charcoal}) \cdot m \cdot \Delta t = 0.8 \times 0.1188 \times (650 - 20) = 59.875 \text{ kJ}$$

$$C_{p,m}(\text{PbSO}_4) = 104.2 \text{ J}\cdot\text{K}^{-1}\cdot\text{mol}^{-1}$$

$$Q_{(\text{PbSO}_4)} = C_{p,m}(\text{PbSO}_4) \cdot m \cdot (m_{\text{PbSO}_4})^{-1} \cdot \Delta t = 104.2 \times 553 \times (303.263)^{-1} \times (650 - 20) = 119.706 \text{ kJ}$$

$$C_{p,m}(\text{PbO}_2) = 64.4 \text{ J}\cdot\text{K}^{-1}\cdot\text{mol}^{-1}$$

$$Q_{(\text{PbO}_2)} = C_{p,m}(\text{PbO}_2) \cdot m \cdot (m_{\text{PbO}_2})^{-1} \cdot \Delta t = 64.4 \times 275 \times (239.199)^{-1} \times (650 - 20) = 46.644 \text{ kJ}$$

$$C_{p,m}(\text{PbO}) = 49.3 \text{ J}\cdot\text{K}^{-1}\cdot\text{mol}^{-1}$$

$$Q_{(\text{PbO})} = C_{p,m}(\text{PbO}) \cdot m \cdot (m_{\text{PbO}})^{-1} \cdot \Delta t = 49.3 \times 168 \times (223.199)^{-1} \times (650 - 20) = 23.378 \text{ kJ}$$

$$Q_{(\text{Input})} = 249.603 \text{ kJ} = \mathbf{69.334 \text{ Wh}}$$

##### 1.2 *Furnace temperature maintenance*

Taking the treatment of SLP in a 1×1×1 m<sup>3</sup> volume resistance furnace as an example:

Fill 50% volume of SLP and charcoal mixture, and according to its density of 5.5 ×10<sup>3</sup> kg·m<sup>-3</sup>, it is known that 2750 kg is filled inside.

Its inner surface area is 6 m<sup>2</sup>, and the industrial resistance furnace maintains a temperature of 30 kW (5kW·m<sup>-2</sup>, 650 °C).

Baking time of 2 h, electricity consumption of 75 kWh (Thermal efficiency: 80%).

$$\text{So, } P_{(\text{maintenance})} = 27.273 \text{ Wh}\cdot\text{kg}^{-1}.$$

$$Q_{(\text{maintenance})} = \mathbf{27.273 \text{ Wh}}$$

In addition, the reaction also releases heat during roasting.

## 2. Electrolysis

### *2.1 Input of electrolytic power*

Each 50 g SLP consumes 2633.6 mAh (scale-up experiment), so 1 kg SLP requires 52.672 Ah. The voltage is 2.2 V, which requires **115.878 Wh** power.

### *2.2 Temperature maintenance of electrolytic furnace*

Similar to the roasting stage,  $Q_{\text{(maintenance)}} = \mathbf{27.273 Wh}$ .

### **Calculations of SO<sub>2</sub> emissions (Fig. 7c)**

The possible SO<sub>2</sub> emissions from each process in Table S2 was calculated as 55.3% PbSO<sub>4</sub> per ton of SLP (i.e., 553 kg-PbSO<sub>4</sub>/t-SLP)

#### **1.The oxygen-rich side-blown bath smelting process**

All 553 kg PbSO<sub>4</sub> is converted to SO<sub>2</sub> in the process, corresponding to 116.83 kg of SO<sub>2</sub> emissions.

#### **2.The sodium carbonate desulfurization process**

This process primarily produces Na<sub>2</sub>SO<sub>4</sub>, and usually the SO<sub>2</sub> emission at this temperature is difficult. However, it's often true that there is nothing that can be done about these sulfur fixers.

#### **3.This work**

About 95% of PbSO<sub>4</sub> is converted to PbS, with only 5% of PbSO<sub>4</sub> producing SO<sub>2</sub> emissions. Therefore, the total SO<sub>2</sub> emissions amount to 5.84 kg.

## References

1. Z. Dong, Z. Zhou, H. Xiong, B. Yang and Y. Dai, *Sep. Purif. Technol.*, 2021, **279**, 119776.
2. W. Li, W. Zhang, L. Luo and X. Xie, *Sep. Purif. Technol.*, 2023, **310**, 123156.
3. Y. Li, S. Yang, P. Taskinen, J. He, F. Liao, R. Zhu, Y. Chen, C. Tang, Y. Wang and A. Jokilaakso, *J. Cleaner Prod.*, 2019, **217**, 162-171.
4. K. Liu, J. Yang, S. Liang, H. Hou, Y. Chen, J. Wang, B. Liu, K. Xiao, J. Hu and J. Wang, *Environ. Sci. Technol.*, 2018, **52**, 2235-2241.
5. Y. Ma and K. Qiu, *Waste Manage.*, 2015, **40**, 151-156.
6. K. Liu, S. Liang, J. Wang, H. Hou, J. Yang and J. Hu, *ACS Sustain. Chem. Eng.*, 2018, **6**, 17333-17339.
7. L. Chai, Z. Li, K. Wang, X. Liu, S. Dai, X. Liu, Y. Sun and J. Pan, *Adv. Sci.*, 2023, **10**, 2304863.
8. C. Chang, S. Yang, Y. Li, C. Xiang, H. Wang, S. Liu, T. Luo and Y. Chen, *Sep. Purif. Technol.*, 2023, **306**, 122592.
9. N. Liu, R. A. Senthil, X. Zhang, J. Pan, Y. Sun and X. Liu, *J. Cleaner Prod.*, 2020, **267**, 122107.
10. F. Dai, H. Huang, B. Chen, P. Zhang, Y. He and Z. Guo, *Sep. Purif. Technol.*, 2019, **224**, 237-246.
11. Y. Hu, J. Yang, J. Hu, J. Wang, S. Liang, H. Hou, X. Wu, B. Liu, W. Yu, X. He and R. V. Kumar, *Adv. Funct. Mater.*, 2018, **28**, 1705294.
